# Supplementary material for: Alkaline Ni-Zn Microbattery Based on 3D Hierarchical Porous Ni Microcathode with High-Rate Performance
Source: MDPI journal article supplement (doi:10.3390/mi14050927), 2023-04-25
Supplement: s1 [file s1]

# Alkaline Ni-Zn Microbattery Based on 3D Hierarchical Porous Ni Microcathode with High-Rate Performance

Gongchuan You <sup>1,†</sup>, Zhe Zhu <sup>1,†</sup>, Yixue Duan <sup>1,2</sup>, Linfeng Lv <sup>1,2</sup>, Xiaoqiao Liao <sup>1</sup>, Xin He <sup>1</sup>, Kai Yang <sup>1</sup>, Ruiqi Song <sup>1</sup>, Yi Yang <sup>3,\*</sup> and Liang He <sup>1,2,4,\*</sup>

<sup>1</sup> School of Mechanical Engineering, Sichuan University, Chengdu 610065, China

<sup>2</sup> State Key Laboratory of Advanced Technology for Materials Synthesis and Processing, Wuhan University of Technology, Wuhan 430070, China

<sup>3</sup> Department of Orthopedics, Orthopedic Research Institute, West China Hospital, Sichuan University, Chengdu 610041, China

<sup>4</sup> Med+X Center for Manufacturing, West China Hospital, Sichuan University, Chengdu 610041, China

\* Correspondence: hxyangyi@163.com (Y.Y.); hel20@scu.edu.cn (L.H.)

† These authors contributed equally to this work.

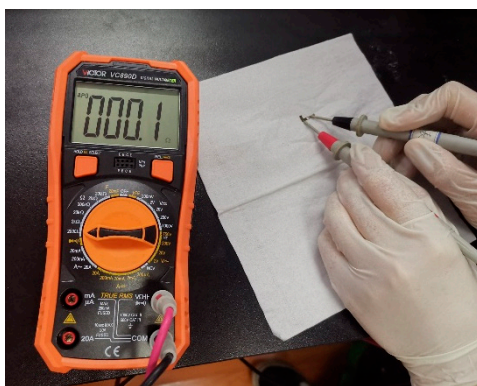

**Figure S1.** Photograph of direct conductivity test of reconstructed 3D hierarchical porous nickel microelectrode.

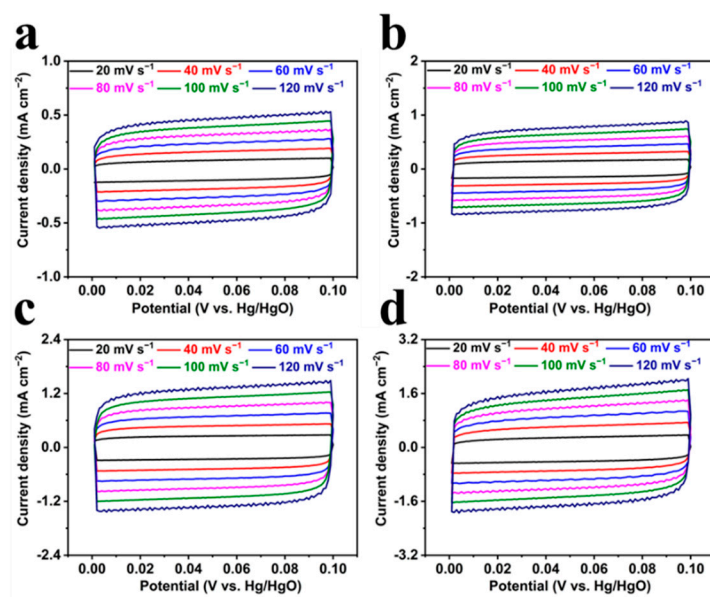

**Figure S2.** CV curves of (a) 30 s, (b) 60 s, (c) 120 s, and (d) 180 s microelectrodes with the potential ranging from 0 to 0.1 V versus Hg/HgO at various scan rates.

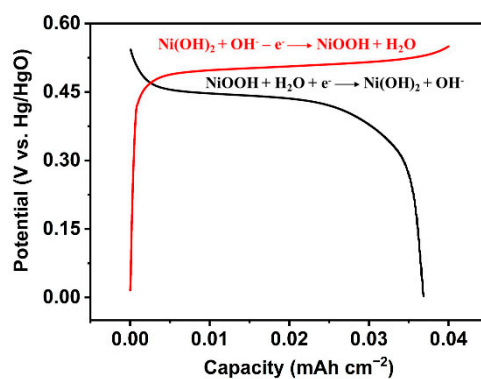

**Figure S3.** The first charge/discharge curve of Ni 30 s microelectrode at a current density of 5 mA cm<sup>-2</sup>.

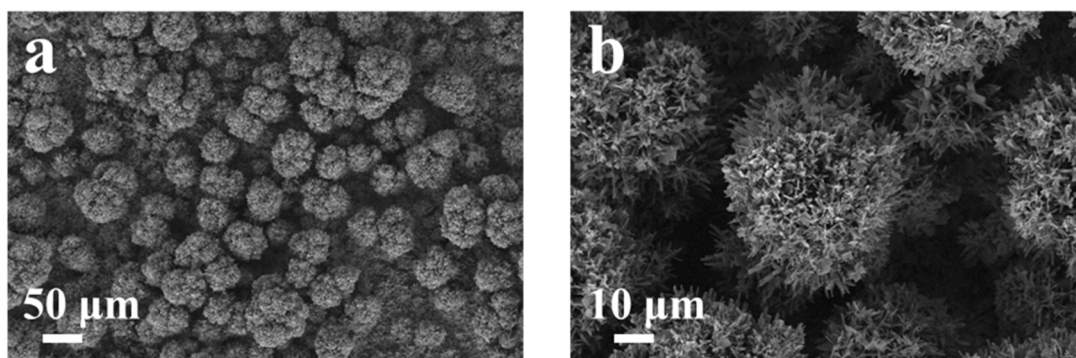

**Figure S4.** SEM images of electrodeposited Zn.

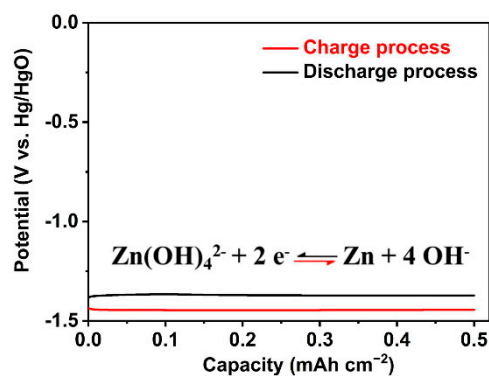

**Figure S5.** The first charge/discharge curve of Zn microelectrode at a current density of 5 mA cm<sup>-2</sup>.

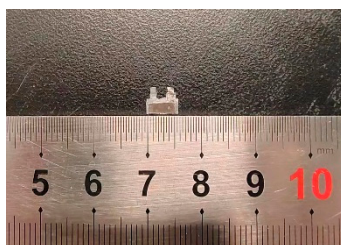

**Figure S6.** Photograph of the assembled Ni-Zn microbattery.

(Notice: The gel electrolyte should be prepared in a thin and almost solid state, otherwise the assembled MB is easy to be short or the packed area needs to be extended.)

**Table S1.** Comparison of electrochemical performance with recently reported MBs and other state-of-the-art micro energy-storage systems (the rate performance here refers to the current range and the related capacity retention (%)).

| Cathode // Anode materials                        | Device type | Capacity (mAh cm <sup>-2</sup> ) | Rate performance                            | Cycling stability (%) | Ref.      |
|---------------------------------------------------|-------------|----------------------------------|---------------------------------------------|-----------------------|-----------|
| Reconstructed porous Ni // Zn                     | Alkaline MB | 0.268                            | 2 to 40 mA cm <sup>-2</sup><br>76.8 %       | 71.2 in 2000 cycles   | This work |
| Ni-Co LDH@CC // Zn                                |             | 0.108                            | 0.5 to 1 mA cm <sup>-2</sup>                | 91 in 1000 cycles     | 1         |
| Co(OH) <sub>2</sub> @NiCo LDH // Zn               |             | 0.108                            | 1 to 10 mA cm <sup>-2</sup><br>39.8 %       | 71 in 800 cycles      | 2         |
| Ni@Ni(OH) <sub>2</sub> // Zn                      |             | 0.152                            | 1 to 30 mA cm <sup>-2</sup><br>59.8 %       | 74.6 in 1800 cycles   | 3         |
| Ni-Ni(OH) <sub>2</sub> /Zn(OH) <sub>2</sub> // Zn |             | 0.149                            | 1 to 200 mA cm <sup>-2</sup> , 85.9 %       | 91.2 in 3500 cycles   | 4         |
| Ag // Zn                                          |             | 0.167                            | 0.4 to 4 $\mu$ A cm <sup>-2</sup><br>46.3 % | 84.2 in 100 cycles    | 5         |

## References

1. Tian, Z.; Sun, Z.; Shao, Y.; Gao, L.; Huang, R.; Shao, Y.; Kaner, R. B.; Sun, J. Ultrafast rechargeable Zn micro-batteries endowing a wearable solar charging system with high overall efficiency. *Energy Environ. Sci.* **2021**, *14*, 1602-1611.
2. Wang, Y.; Hong, X.; Guo, Y.; Zhao, Y.; Liao, X.; Liu, X.; Li, Q.; He, L.; Mai, L. Wearable Textile-Based Co-Zn Alkaline Microbattery with High Energy Density and Excellent Reliability. *Small* **2020**, *16*, 2000293.
3. Hao, Z.; Xu, L.; Liu, Q.; Yang, W.; Liao, X.; Meng, J.; Hong, X.; He, L.; Mai, L., On-Chip Ni-Zn Microbattery Based on Hierarchical Ordered Porous Ni@Ni(OH)<sub>2</sub> Microelectrode with Ultrafast Ion and Electron Transport Kinetics. *Adv. Funct. Mater.* **2019**, *29*, 1808470.
4. Zhu, Z.; Kan, R.; Wu, P.; Ma, Y.; Wang, Z.; Yu, R.; Liao, X.; Wu, J.; He, L.; Hu, S.; Mai, L. A Durable Ni-Zn Microbattery with Ultrahigh-Rate Capability Enabled by In Situ Reconstructed Nanoporous Nickel with Epitaxial Phase. *Small* **2021**, *17*, 2103136.
5. Bi, S.; Wan, F.; Wang, S.; Jia, S.; Tian, J.; Niu, Z. Flexible and tailorable quasi-solid-state rechargeable Ag/Zn microbatteries with high performance. *Carbon Energy* **2021**, *3*, 167-175.
